# Supplementary material for: Baicalin Exerts Anti‐Airway Inflammation and Anti‐Remodelling Effects in Severe Stage Rat Model of Chronic Obstructive Pulmonary Disease
Source: Hindawi journal article supplement (doi:10.1155/2018/7591348), 2018-01-01
Supplement: f1 [file 7591348.f1.zip]

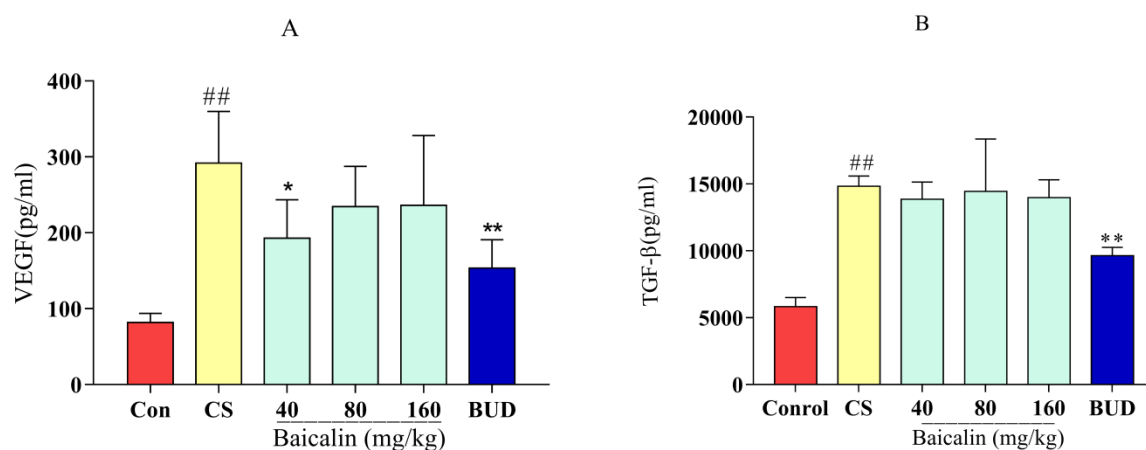

Supplemental Figure 1. Effects of baicalin on VEGF and TGF- $\beta$  concentration. A:VEGF; B: TGF- $\beta$ ; The data are shown as the mean  $\pm$  the standard deviation(SD).\* $p < 0.05$  and \*\* $p < 0.01$  indicate a statistically significant difference compared to the model group; # $p < 0.05$  and ## $p < 0.01$  indicate a statistically significant difference in model group compared with control group.
